# Supplementary material
Source: Springer Nature journal article supplement (https://www.springermedizin.de/resource/supplementary/12877_2008_145_MOESM3_ESM.pdf/9441264)
Supplement: MOESM3 [file 9441264]

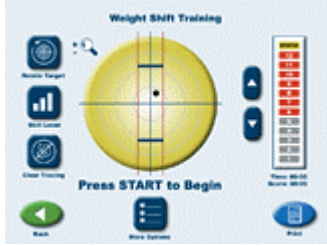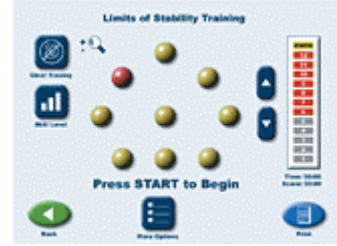

### Weight-shift Training

Participants are challenged to shift and control their centre of gravity within two parallel lines. Changing the width of the lines controls the degree of difficulty. **Score is kept to track progress**

### LOS Training

Challenges the patient's balance within their sway envelope.

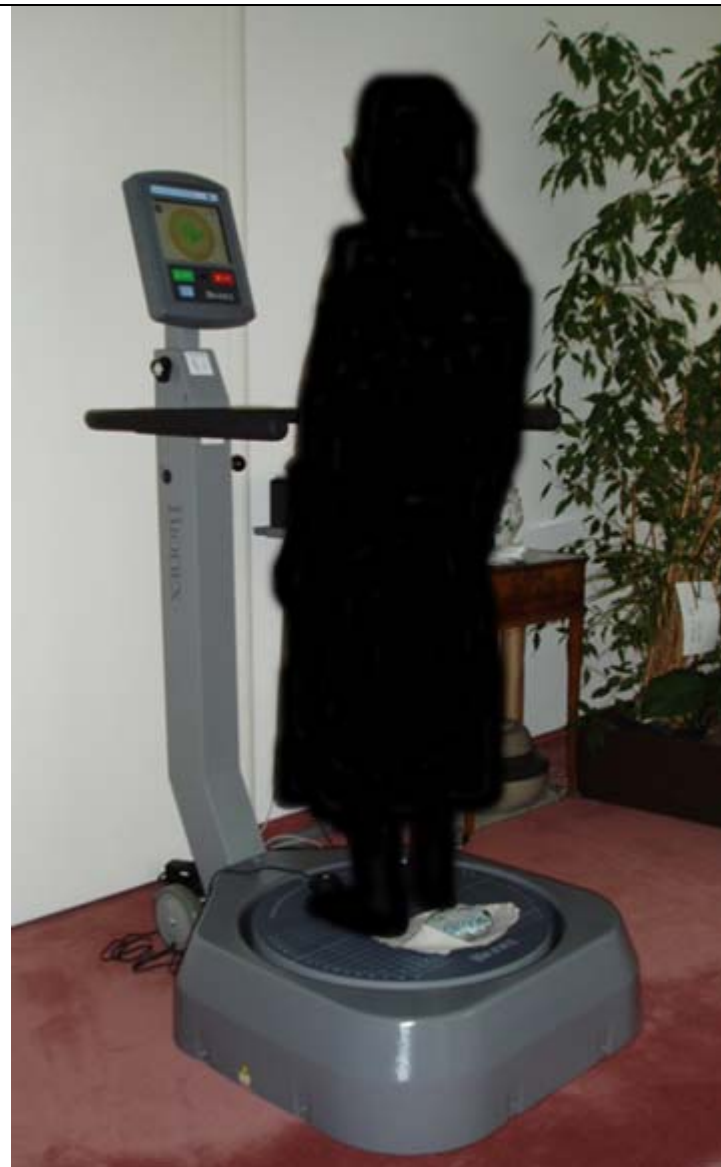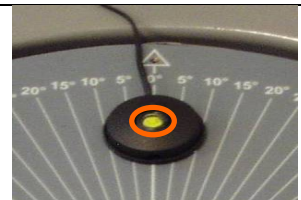

The level placed in front of the EF participants.
